# Supplementary material for: Availability and Accessibility of Live Nonreplicating Smallpox/Mpox Vaccine
Source: PubMed Central journal article supplement (PMC10082399; doi:10.1001/jamanetworkopen.2023.7873), 2023-04-07
Supplement: jamanetwopen-e237873-s001.pdf [file jamanetwopen-e237873-s001.pdf]

## Data Sharing Statement

Kahn. Availability and Accessibility of Live Nonreplicating Smallpox/Mpox Vaccine. *JAMA Netw Open*. Published April 07, 2023. doi:10.1001/jamanetworkopen.2023.7873

### Data

**Data available:** Yes

**Data types:** Data (not involving human participants)

**How to access data:** [walter.mathis@yale.edu](mailto:walter.mathis@yale.edu)

**When available:** With publication

### Supporting Documents

**Document types:** None

### Additional Information

**Who can access the data:** anyone requesting data

**Types of analyses:** for any purpose

**Mechanisms of data availability:** with investigator support
